# Supplementary material
Source: Research Square preprint supplement (doi:10.21203/rs.3.rs-9568624/v1)
Supplement: Supplementary file 1 [file 2f5d149b0a6b2969ad9a5e21.xlsx]

## Sheet: Agreed Upon Codes
Unique code names for topic		Unique affected groups	Specificity of each affected group		Levels of the socioecological model of public health (pre-existing codes)
Credentialing		Clients	Specific		Public Policy
Finance/Pay/Billing		Communities	General		Institutional
Staffing Inadequacy (includes hiring challenges, burnout, and retention issues)		Families	Specific		Community
Role clarity among individuals, their coworkers, and leadership		Agencies/Teams/Mobile Crisis Response Team Members	General		Interpersonal
Work environment (non-role clarity related issues)		Entry Level Crisis Staff	Somewhat Specific		Intrapersonal
Career Progression		Engagement Specialists	Specific
		Clinicians/Crisis Counselors	Specific
		Administrators and Supervisors	Specific
		Policymakers	Specific
		Prospective Engagement Specialists	Specific
		Prospective Mobile Crisis Response Team Members	Specific

## Sheet: Per Category Kappa Calculations
Problems
Code	a(1,1)	b(1,0)	c(0,1)	d(0,0)	Po	Pe	κ
Credentialing	1	1	1	15	0.888889	0.802469	0.4375
Finance/Pay/Billing	2	1	0	15	0.944444	0.759259	0.769231
Staffing Inadequacy	8	0	0	10	1	0.506173	1
Role clarity	8	1	1	8	0.888889	0.5	0.777778
Work environment	0	0	1	17	0.944444	0.944444	0
Career progression	0	0	1	17	0.944444	0.944444	0
Affected Groups
Code	a(1,1)	b(1,0)	c(0,1)	d(0,0)	Po	Pe	kappa
Clients	16	0	0	2	1	0.802469	1
Communities	3	0	1	14	0.944444	0.685185	0.823529
Families	1	0	0	17	1	0.895062	1
Agencies/Teams/Mobile Crisis Response Team Members	7	2	1	8	0.833333	0.5	0.666667
Entry Level Crisis Staff	0	1	1	16	0.888889	0.895062	-0.058824
Engagement Specialists	7	1	1	9	0.888889	0.506173	0.775
Clinicians/Crisis Counselors	1	1	1	15	0.888889	0.802469	0.4375
Administrators and Supervisors	4	1	0	13	0.944444	0.623457	0.852459
Policymakers	1	0	0	17	1	0.895062	1
Prospective Engagement Specialists	1	0	0	17	1	0.895062	1
Prospective Mobile Crisis Response Team Members	1	0	0	17	1	0.895062	1
Levels of Leverage (per-category, pre-GMB responses)
Code	a(1,1)	b(1,0)	c(0,1)	d(0,0)	Po	Pe	κ
Public Policy	6	2	0	1	0.777778	0.62963	0.4
Institutional	5	1	2	1	0.666667	0.592593	0.181818
Community	0	0	3	6	0.666667	0.666667	0
Interpersonal	0	0	0	9	1	1
Intrapersonal	0	1	0	8	0.888889	0.888889	0
Levels of Leverage (per-category, post-GMB responses)
Code	a(1,1)	b(1,0)	c(0,1)	d(0,0)	Po	Pe	κ
Public Policy	8	0	0	1	1	0.802469	1
Institutional	6	0	2	1	0.777778	0.62963	0.4
Community	1	0	0	8	1	0.802469	1
Interpersonal	0	0	1	8	0.888889	0.888889	0
Intrapersonal	0	0	0	9	1	1
Levels of Leverage (per-category, combined pre- and post-GMB responses)
Code	a(1,1)	b(1,0)	c(0,1)	d(0,0)	Po	Pe	κ
Public Policy	14	2	0	2	0.888889	0.716049	0.608696
Institutional	11	1	4	2	0.722222	0.611111	0.285714
Community	1	0	3	14	0.833333	0.746914	0.341463
Interpersonal	0	0	1	17	0.944444	0.944444	0
Intrapersonal	0	1	0	17	0.944444	0.944444	0

## Sheet: Overall Kappa Calculations
Problems
N_binary_decisions	108
a(1,1)	19
b(1,0)	3
c(0,1)	4
d(0,0)	82
Po	0.935185
Pe	0.670096
κ	0.803534
Affected Groups
N_binary_decisions	198
a(1,1)	42
b(1,0)	6
c(0,1)	5
d(0,0)	145
Po	0.944444
Pe	0.635292
κ	0.847671
Levels of Leverage (per-category, pre-GMB responses)
N_binary_decisions	45
a(1,1)	11
b(1,0)	4
c(0,1)	5
d(0,0)	25
Po	0.8
Pe	0.548148
κ	0.557377
Levels of Leverage (per-category, post-GMB responses)
N_binary_decisions	45
a(1,1)	15
b(1,0)	0
c(0,1)	3
d(0,0)	27
Po	0.933333
Pe	0.533333
κ	0.857143
Levels of Leverage (per-category, combined pre- and post-GMB responses)
N_binary_decisions	90
a(1,1)	26
b(1,0)	4
c(0,1)	8
d(0,0)	52
Po	0.866667
Pe	0.540741
κ	0.709677

## Sheet: Specificity Changes
Change in Proportion of Identified Affected Groups at Each Level of Specificity	Value
Δ Specific (%) — Median (Range)	-2% (–50% to +17%)
Δ Somewhat Specific (%) — Median (Range)	-6% (-50% to 0)
Δ General (%) — Median (Range)	+8% (0 to 50%)
Note: Negative Δ indicates a shift toward fewer responses in that specificity category.
