# Supplementary material
Source: Research Square preprint supplement (doi:10.21203/rs.3.rs-9568624/v1)
Supplement: Supplementary file 2 [file d5893813445e2824afc798ba.pdf]

# Group Model Building: Initial Problem Framing

Please answer the following question

\* Indicates required question

---

1. Email \*

---

2. Name \*

---

3. Organization \*

---

4. Role \*

---

5. Have you ever directly provided behavioral health services? \*

*Mark only one oval.*

Yes

No

6. Do you hold a CRSS or CPRS certification? \*

*Mark only one oval.*

- Yes    *Skip to question 9*
- No    *Skip to question 9*

7. Have you ever worked as a Mental Health Professional in any setting, as defined by IL Medicaid? \*

*Mark only one oval.*

- Yes
- No

8. Have you ever directly provided or directed mobile crisis services? \*

*Mark only one oval.*

- Yes    *Skip to question 9*
- No    *Skip to question 12*

*Skip to question 12*

### Mobile Crisis Questions

9. Please select all of the following roles you have ever held while providing mobile crisis services: \*

*Check all that apply.*

- Peer Support Specialist (for example, an Engagement Specialist on a Program 590-funded team)
- Mental Health Professional (for example, a Crisis Counselor on a Program 590-funded team)
- Team Lead
- Other: \_\_\_\_\_

10. Do you currently directly provide or direct mobile crisis services? \*

Mark only one oval.

Yes

No

11. Please select all of the following roles you *currently* hold while providing mobile crisis services:

Check all that apply.

Peer Support Specialist (for example, an Engagement Specialist on a Program 590-funded team)

Mental Health Professional (for example, a Crisis Counselor on a Program 590-funded team)

Team Lead

Other: \_\_\_\_\_

Mobile crisis services (e.g. services provided by Program 590 Recipients, Medicaid-billing crisis response teams, etc.) are those that perform community-based response to individuals in behavioral health crisis. Please reflect on **sufficiency of this workforce in Illinois** now and in the future, and answer the following questions.

12. **Please write down the most important problem that you think Illinois needs to address. What are you most concerned about when it comes to the sufficiency of this workforce?** \*

For example: "There are not enough people that qualify to be MHPs."

---

---

---

---

---

13.

\*

**Please describe what you think causes this specific problem.**

---

---

---

---

---

14.

\*

**Please describe the who is impacted by the problem and *how* the individual/group is impacted.**

For example: "Administrators of mobile crisis services *cannot fully staff their teams.*"

---

---

---

---

---

15.

**If there is an additional individual or group impacted, please describe the who is impacted by the problem and *how* the additional individual/group is impacted.**

For example: "Illinoisans in crisis *are being forced to go to the ER.*"

---

---

---

---

---

**Below, please describe three potential solutions for this problem. Be specific about who needs to do *what*.**

For example: *“High school administrators should invite providers of mobile crisis services to present on their career path and exciting career.”*

16. Solution #1: \*

---

17. Solution #2: \*

---

18. Solution #3: \*

---

---

This content is neither created nor endorsed by Google.

Google Forms
