# Supplementary material
Source: Research Square preprint supplement (doi:10.21203/rs.3.rs-9568624/v1)
Supplement: Supplementary file 3 [file d8c03ba3c1f01e0eebade5d1.docx]

**Supplemental Table S4-1: Variables Directly Influencing the *Likelihood of Departure* for Crisis Counselors and Engagement Specialists**

| Variable Directly Influencing Likelihood of Departure | Direction of Effect on Likelihood of Departure (S/O) |
| --- | --- |
| Individual level of recovery | O |
| Meaningfulness of the work | O |
| Team-based work and support | O |
| Shift flexibility | O |
| Previous experience in mental health field | O |
| Safety risks posed by crisis work | S |
| Administrative tasks required for each patient seen | S |
| Individual workload | S |
| Challenges working with community partners (e.g., law enforcement, ER physicians) | S |
| Difficulty in time management | S |
| Difficulty working in teams | S |
| Sufficiency of salary | O |
| Cost of living | S |
| Gap between private sector and crisis team salaries | S |
| Vicarious trauma | S |
| On-call hours | S |
| Precariousness of grant-based funding roles | S |
| Impact of shift work on well-being (esp. sleep) | S |
| Balance of autonomy with quality supervision | O |
| Preparedness for role | O |
| Tuition reimbursement (Community Behavioral Health Care Professional Loan Repayment Program) | O |
| *Variables Specific to Engagement Specialists* | |
| Role strain | S |
| Supervisor support and knowledge of working with peers | O |
| Recovery-oriented provider culture | O |
| Pay gap between certified ESs and CCs | S |
| Triggering work | S |
| Lack of promotional opportunities | S |

“O” = Opposite; “S” = Same

**Supplemental Table S4-2: Variables Driving the Salary of Crisis Workers**

| **Salary Variable** | **Parent Variable Directly Influencing Salary** | **Child Variable** | **Grandchild Variable** | **Great-Grandchild Variable** | **Great-Great-Grandchild Variable** | **Direction of Effect on Immediate Parent** |
| --- | --- | --- | --- | --- | --- | --- |
|  | Funds available to pay salaries for all staff (Certified and Uncertified ESs, CCs, QMHPs, and LPHAs) |  |  |  | | S |
| Effective salary of ESs and CCs |  | Total revenue of the organization |  |  | | S |
|  |  |  | Total amount reimbursed by Medicaid |  |  | S |
|  |  | Medicaid reimbursement rates |  | S |
|  |  | CCBHC prospective payment model |  | S |
|  |  | Prescriptive Medicaid service definitions |  | S |
|  |  | Complexity of administrative billing requirements |  | O |
|  |  |  | Proportion of clients who are known to be enrolled in Medicaid |  | S |
|  |  |  | Unhoused patient population served by the crisis team | O |
|  |  | Size of organization (including a dedicated billing department) |  | S |
|  |  | Private insurance reimbursement |  |  | S |
|  |  | Program 590 Grant Money allocation |  |  | S |
|  |  | Additional revenue streams from non-mobile crisis services |  |  | S |
|  |  | Operational costs/overhead (all costs other than salaries) |  |  |  | O |
|  |  |  | Frequency of resource waste due to overstaffing (more staff than crises) |  |  | S |
|  |  |  | Accuracy of predicted number of staff needed per shift |  | O |
| Organizational willingness and ability to turn remaining funds into higher salaries |  |  |  |  | S |
| Bonuses/ incentives/ benefits |  |  |  |  | S |
| Minimum wage |  |  |  |  | S |
|  | Staff out of pocket costs |  | | | | O |
|  | Per mile reimbursement rate |  |  |  | O |
| Effective Salary of Certified and Uncertified ESs | Discrepancy between ES and CC salary |  |  |  |  | O |
| Effective Salary of Uncertified ESs | Discrepancy in Uncertified vs Certified ES Salary |  |  |  |  | O |

Legend: ES = Engagement Specialist, CC = Crisis Counselor, QMHP = Qualified Mental Health Professional, LPHA = Licensed Practitioner of the Healing Arts, CCBHC = Certified Community Behavioral Health Clinic;

S = moves in the same direction as the immediate parent, O = opposite direction

**Supplemental Table S4-3: Variables Driving the Inflow of Crisis Counselors into the Mobile Crisis Workforce**

| **Inflow Variable** | **Parent Variable Directly Influencing Inflow** | **Child Variable** | **Grandchild Variable** | **Direction of Effect on Immediate Parent** |
| --- | --- | --- | --- | --- |
| Inflow into Crisis Counselor Workforce | Crisis Counselor Position Awareness |  |  | S |
|  | Word-of-mouth discussion of the Crisis Counselor position |  | S |
|  |  | Position visibility at job fairs/community events |  | S |
|  |  | Size of organization | S |
|  | Position Attractiveness for Crisis Counselors |  |  | S |
|  | CC effective salary | (see Supplemental Table S4-2) | S |
|  | Team-based work and support |  | S |
|  | Meaningfulness of the work (including lived experience) |  | S |
|  | Shift flexibility |  | S |
|  | Demand for CCs |  | S |
|  | Tuition reimbursement (e.g. Community Behavioral Health Care Professional Loan Repayment Program) |  | S |

Legend: CC = Crisis Counselor; S = moves in the same direction as the immediate parent, O = opposite direction

**Supplemental Table S4-4: Variables Driving the Inflow of Engagement Specialists into the Mobile Crisis Workforce**

| **Inflow Variable** | **Variable Directly Influencing Inflow** | **Child Variable** | **Grandchild Variable** | **Direction of Effect on Immediate Parent** |
| --- | --- | --- | --- | --- |
| Inflow into Engagement Specialist Workforce | Position Attractiveness for certified individuals working on crisis team |  |  | S |
|  | Certified ES salary |  | S |
|  | Tuition Reimbursement (Community Behavioral Health Care Professional Loan Repayment Program) |  | S |
|  | Shift flexibility |  | S |
|  | Attractiveness of Peer Specialist Profession Overall |  |  | S |
|  | Meaningfulness of the work |  | S |
|  | Demand for peer specialists |  | S |
|  | National peer organization |  | S |
|  | Attractiveness of Uncertified ES Role on Crisis Team |  |  | S |
|  | Uncertified ES salary |  | S |
|  | Presence of other peers within the organization |  | S |
|  | Career growth/promotional opportunities |  | S |
|  | Shift flexibility |  | S |
|  | Percentage of applicants that meet vehicle, license, crisis experience, and background check requirements |  |  | S |
|  |  | Percentage of applicants meeting vehicle requirements for the position |  | S |
|  |  | Percentage of open positions that require a vehicle | O |
|  |  | Percentage of applicants meeting license requirements for the position |  | S |
|  |  | Percentage of open positions that require a license | O |
|  |  | Percentage of applicants who have worked the number of years of crisis field required to be hired by a crisis team |  | S |
|  |  | Percentage of open positions that require a certain number of years of crisis experience | O |
|  | Percentage of individuals who pass the required background checks |  | S |

Legend: ES = Engagement Specialist, CRSS = Certified Recovery Support Specialist, CPRS = Certified Peer Recovery Specialist;
S = moves in the same direction as the immediate parent, O = opposite direction.
